# 1 **Building Genomic Analysis Pipelines in a Hackathon Setting** 2 **with Bioinformatician Teams: DNA-seq, Epigenomics,** 3 **Metagenomics and RNA-seq**

4  
5 Ben Busby<sup>1\*</sup>, Allissa Dillman<sup>2</sup>, Claire L. Simpson<sup>3</sup>, Ian Fingerman<sup>1</sup>, Sijung Yun<sup>4</sup>, David M.  
6 Kristensen<sup>1</sup>, Lisa Federer<sup>5</sup>, Naisha Shah<sup>6</sup>, Matthew C. LaFave<sup>7</sup>, Laura Jimenez-Barron<sup>8-9</sup>,  
7 Manjusha Pande<sup>10</sup>, Wen Luo<sup>11</sup>, Brendan Miller<sup>12</sup>, Cem Meydan<sup>13</sup>, Dhruva Chandramohan<sup>13-14</sup>,  
8 Kipper Fletez-Brant<sup>15-16</sup>, Paul W. Bible<sup>17</sup>, Sergej Nowoshilow<sup>18</sup>, Alfred Chan<sup>19</sup>, Eric JC  
9 Galvez<sup>20</sup>, Jeremy Chignell<sup>21</sup>, Joseph N. Paulson<sup>22-23</sup>, Manoj Kandpal<sup>24</sup>, Suhyeon Yoon<sup>25</sup>, Esther  
10 Asaki<sup>26-27</sup>, Abhinav Nellore<sup>15,28</sup>, Adam Stine<sup>1</sup>, Robert Sanders<sup>1</sup>, Jesse Becker<sup>1</sup>, Matt Lesko<sup>1</sup>,  
11 Mordechai Abzug<sup>1</sup>, Eugene Yaschenko<sup>1</sup>

12  
13 <sup>1</sup> National Center for Biotechnology Information, National Library of Medicine, National  
14 Institutes of Health, Bethesda, Maryland, United States of America

15 <sup>2</sup> Surgery, Center for Prostate Disease Research, Uniformed Services University of the Health  
16 Sciences, Bethesda, Maryland, United States of America

17 <sup>3</sup> Computational and Statistical Genomics Branch, National Human Genome Research Institute,  
18 National Institutes of Health, Baltimore, Maryland, United States of America

19 <sup>4</sup> Laboratory of Cell Biology, National Institute of Diabetes and Digestive and Kidney Diseases,  
20 National Institutes of Health, Bethesda, Maryland, United States of America

21 <sup>5</sup> NIH Library, Division of Library Services, Office of Research Services, National Institutes of  
22 Health, Bethesda, Maryland, United States of America

23 <sup>6</sup> Systems Genomics and Bioinformatics Unit, National Institute of Allergy and Infectious  
24 Diseases, National Institutes of Health, Bethesda, Maryland, United States of America

25 <sup>7</sup> Translational and Functional Genomics Branch, National Human Genome Research Institute,  
26 National Institutes of Health, Bethesda, Maryland, United States of America

27 <sup>8</sup> Stanley Institute for Cognitive Genomics, Cold Spring Harbor Laboratory, Cold Spring Harbor,  
28 New York, United States of America

29 <sup>9</sup> Centro de Ciencias Genomicas, Universidad Nacional Autonoma de Mexico, Cuernavaca,  
30 Morelos, Mexico

31 <sup>10</sup> Bioinformatics Core, University of Michigan, Ann Arbor, Michigan

32 <sup>11</sup> Cancer Genomics Research Laboratory, Division of Cancer Epidemiology and Genetics,  
33 National Cancer Institute, National Institutes of Health, Gaithersburg, Maryland, United States of  
34 America

35 <sup>12</sup> Department of Biology, Johns Hopkins University, Baltimore, Maryland, United States of  
36 America

37 <sup>13</sup> Institute for Computational Biomedicine, Weill Cornell Medical College, New York, New  
38 York, United States of America

39 <sup>14</sup> Tri-Institutional Training Program in Computational Biology and Medicine, New York, New  
40 York, United States of America

41 <sup>15</sup> Department of Biostatistics, Johns Hopkins Bloomberg School of Public Health, Baltimore,  
42 Maryland, United States of America

43 <sup>16</sup> McKusick-Nathans Institute of Genetic Medicine, Johns Hopkins University School of  
44 Medicine, Baltimore, Maryland, United States of America

45 <sup>17</sup> Laboratory of Skin Biology, National Institute of Arthritis and Musculoskeletal and Skin

46 Diseases, National Institutes of Health, Bethesda, Maryland, United States of America  
47 <sup>18</sup> Center for Regenerative Therapies, Technische Universität Dresden, Dresden, Germany  
48 <sup>19</sup> Translational Immunology, John Wayne Cancer Institute at Saint John's Health Center, Santa  
49 Monica, California, United States of America  
50 <sup>20</sup> Microbial Immune Regulation Group, Helmholtz Centre for Infection Research,  
51 Braunschweig, Germany  
52 <sup>21</sup> Chemical and Biological Engineering, Colorado State University, Fort Collins, Colorado,  
53 United States of America  
54 <sup>22</sup> Graduate Program in Applied Mathematics & Statistics, and Scientific Computation,  
55 University of Maryland, College Park, Maryland, United States of America  
56 <sup>23</sup> Center for Bioinformatics and Computational Biology, University of Maryland, College Park,  
57 Maryland, United States of America  
58 <sup>24</sup> Division of Health and Biomedical Informatics, Department of Preventive Medicine, Feinberg  
59 School of Medicine, Northwestern University, Chicago, Illinois, United States of America  
60 <sup>25</sup> Genetics and Molecular Biology Branch, National Human Genome Research Institute,  
61 National Institutes of Health, Bethesda, Maryland, United States of America  
62 <sup>26</sup> Bioinformatics and Molecular Analysis Section, Center for Information Technology, National  
63 Institutes of Health, Bethesda, Maryland, United States of America  
64 <sup>27</sup> SRA International, Fairfax, Virginia, United States of America  
65 <sup>28</sup> Department of Computer Science, Johns Hopkins University, Baltimore, Maryland, United  
66 States of America  
67  
68 \*Corresponding author  
69 Email: [ben.busby@gmail.com](mailto:ben.busby@gmail.com) (BB)  
70

## 71 **Abstract**

72           We assembled teams of genomics professionals to assess whether we could rapidly  
73 develop pipelines to answer biological questions commonly asked by biologists and others new  
74 to bioinformatics by facilitating analysis of high-throughput sequencing data. In January 2015,  
75 teams were assembled on the National Institutes of Health (NIH) campus to address questions in  
76 the DNA-seq, epigenomics, metagenomics and RNA-seq subfields of genomics. The only two  
77 rules for this hackathon were that either the data used were housed at the National Center for  
78 Biotechnology Information (NCBI) or would be submitted there by a participant in the next six  
79 months, and that all software going into the pipeline was open-source or open-use. Questions  
80 proposed by organizers, as well as suggested tools and approaches, were distributed to

81 participants a few days before the event and were refined during the event. Pipelines were  
82 published on GitHub, a web service providing publicly available, free-usage tiers for  
83 collaborative software development (<https://github.com/features/>). The code was published at  
84 <https://github.com/DCGenomics/> with separate repositories for each team, starting with  
85 hackathon\_v001.

86

## 87 **Introduction**

88 Genomic analysis leverages large datasets generated by sequencing technologies in order  
89 to gain better understanding of the genomes of humans and other species. Given its reliance on  
90 large datasets with complex interactions and its fairly regularized metadata, genomic analysis is  
91 an exemplar of “big data” science (1). Genomic analysis has shown great promise in finding  
92 actionable variants for rare diseases (2), as well as directing more specific clinical action for  
93 common diseases (3, 4).

94 Due to its potential for significant clinical and basic science discoveries, genomics has  
95 drawn many newcomers from the biological and computational sciences, as well as investigators  
96 from new graduate programs in bioinformatics. While many of these investigators can run  
97 established pipelines on local, public, or combined datasets, most do not have the expertise or  
98 resources to establish and validate novel pipelines. Additionally, highly experienced genomic  
99 investigators often lack the resources necessary to generate and distribute pipelines with broader  
100 applicability outside their specific area of research. In this study, we aimed to assess whether we  
101 could close this gap by bringing genomics experts from around the world together to establish  
102 public pipelines that can be both used by newcomers to genomics and refined by other seasoned  
103 professionals.

104           We sought to achieve this by hosting a hackathon at the National Institutes of Health  
105 (NIH) in Bethesda, Maryland. Hackathons are events in which individuals with expertise in  
106 various areas of software development and science come together to collaborate intensively over  
107 a period of several days, typically focusing on a specific goal or application. This form of  
108 crowdsourcing facilitates innovative ideas and agile development of solutions for challenging  
109 questions (5). Hackathon participants also benefit from the opportunity to learn new skills,  
110 network with other professionals, and gain the personal satisfaction of using their expertise to  
111 help the community.

112           Those of us who had previously attended hackathons had been motivated by learning  
113 from the experience, personal curiosity, professional networking, and the satisfaction of applying  
114 one's skills to help the community. These previously attended hackathons included  
115 IT/programming-centric events, such as the Kaiser Permanente-sponsored hackathon for apps  
116 that could help prevent and fight obesity (6); bioinformatics-oriented events, such as the  
117 Illumina-sponsored hackathon to create apps in their proprietary BaseSpace cloud computing  
118 environment (7); and events focused on social issues, such as exploring women's empowerment  
119 and nutrition in the developing world (8).

120           Hackathons are more common in software development communities than in  
121 bioinformatics and medicine, and may represent a valuable opportunity to accelerate biomedical  
122 discovery and innovation. Hackathons have gained popularity in the bioinformatics community  
123 in the last several years, though the environment and culture of a bioinformatics hackathon  
124 differs from that of typical IT/programming-centric hackathons (9). Bioinformatic hackathons  
125 more closely resemble a scientific discussion and provide an opportunity to learn and delve more  
126 deeply into specific areas. Typically a successful hackathon requires participants with both

127 coding/programming skills and domain-specific knowledge (e.g. DNA-seq and RNA-seq).

128         Four teams of 4-6 participants came together for this hackathon to answer questions in  
129 the fields of DNA-seq, RNA-seq, metagenomics and epigenomics. The initial topics for  
130 exploration were based on questions bioinformaticians frequently ask computational cores.  
131 Massive amounts of data have been generated and made publicly available in these fields using  
132 high-throughput experimental technologies. Powerful computational pipelines are needed to  
133 handle such large datasets, and to help analyze the data to answer biomedical questions. In  
134 addition, these topics have seen a significant increase in publications in recent years, as  
135 demonstrated in Figure 1.

136 **Fig. 1: Articles indexed in MEDLINE for topics related to each of the four teams.**

## 137 **Background for Hackathon Team Goals**

### 138 *DNA-seq Team*

139         The goal for the DNA-seq Team was to create an easy-to-use integrated pipeline using  
140 existing tools to predict somatic variants from exome sequencing data, find shared and unique  
141 variants between samples, and filter and annotate the variants. Somatic mutation calling is  
142 particularly relevant to cancer genome characterization (10). Several methods exist to predict  
143 somatic variants by interrogating genomic sequences of tumor-germline paired samples (11-13).  
144 Issues with these variant calling algorithms are well known; each of the algorithms have  
145 strengths and weaknesses, and are sensitive to the datasets used (14). One way to test the  
146 reliability of the called variants and gain more confidence is to combine putative calls from  
147 several algorithms and use strict filtering criteria. Thus, we wanted to create a pipeline that  
148 included several existing calling algorithms. In addition, we intended to build a module within  
149 the pipeline to predict eQTLs using the called somatic variants and RNA-seq data from the same

150 individuals. To achieve our goal of building an integrated pipeline, a paired exome sequence  
151 dataset as well as an RNA sequence dataset were required.

152 *Epigenomics Team*

153 Computational cores contain an abundance of epigenetic data encompassing a wide  
154 variety of markers over many different cell types. This abundance of information empowers labs  
155 to infer how these different markers contribute to gene expression and chromatin state. However,  
156 little standardization or collaboration exists among investigators seeking to elucidate  
157 relationships among epigenetic modifiers, leading to inconsistencies between analyses. The  
158 Epigenomics Team sought to analyze the extent to which DNA methylation and histone  
159 modifications affect gene expression using regression models. In addition to modelling, we  
160 wanted to create a framework for integrating experimental ChIP-seq or DNA methylation data  
161 provided by users into models of gene expression that were informed by publicly available data.  
162 A resource that allows users to make sense of their data in the context of the existing wealth of  
163 public data on epigenetic regulation provided an attractive and worthwhile goal.

164 *Metagenomics Team*

165 The Metagenomics Team worked on the problem of identifying the presence of viral  
166 sequences within human genomic or metagenomic sequences. The ability to locate these viral  
167 sequences offers the prospect of using computational tools for diagnostic purposes (15). Viral  
168 sequences may be embedded within human genomic sequence data as endogenous retroviruses  
169 or associated with bacterial consortia of the human microbiome as either lytic phages or  
170 prophages integrated into the bacterial genomes. Several studies have demonstrated the  
171 association between human-specific endogenous retroviruses (HERV) and diseases such as  
172 breast cancer (16, 17). In the context of the human microbiome, previous studies have used

173 metagenomics to describe differences in bacterial consortia (18), but only a few studies have  
174 applied a metagenomics workflow to viral sequences present in human microbiome data (19,  
175 20).

176 This team's aim was to develop and compare analytical pipelines to identify and quantify  
177 viral sequences within human genomic and metagenomic datasets. The pipeline could be used in  
178 the characterization of the viral community in understanding the role viruses play in various  
179 environmental niches and diseases eventually associating differentially abundant viruses in  
180 disease or phenotype, despite database and sparsity issues potentially using marker-gene  
181 methodologies (21).

#### 182 *RNA-seq Team*

183 RNA sequencing (RNA-seq) has become a useful technique for detecting gene  
184 expression levels, alternate splicing, and gene fusions (22). RNA variant detection can be  
185 important in cancer research to detect significant changes in tumor progression (23). The team's  
186 initial goal was to build a variant calling pipeline using RNA-seq data from melanoma samples  
187 to differentiate germline and somatic mutations from RNA editing. Some sample datasets from  
188 the National Center for Biotechnology Information's (NCBI) Sequence Read Archive (SRA)  
189 were suggested. Data could then be used to compare germline variants with known germline  
190 variants from the dbGaP version of the 1000 Genomes Project and ClinVar (24, 25). Another  
191 task was to determine isoform specificity based on mapping to 454 data using available software  
192 for the correlation with RNA structure prediction. Data could also be compared with the NCI-60  
193 cell line variants. Also, we could try to determine mosaicism with germ-line vs intratumor data.  
194 Additional tasks were to detect systematic quality score variants indicating RNA editing with  
195 Illumina and Pacbio reads, correlate with RNA structure prediction and to fix HTseq annotation

196 of tiny exons in UTRs.

## 197 **Materials and Methods**

### 198 **Advertising, Preparation, and Logistics**

199 Four team leads were selected by Busby to participate in the event. Team leads were  
200 experts in particular areas and they suggested scientific areas, datasets, or tools that they were  
201 familiar with. In order to recruit participants, we sent an announcement (Supporting Information  
202 1) to contacts in Busby's network encouraging genomics professionals to apply for the  
203 hackathon, as well as posting it on several NCBI social media outlets, such as Facebook, Twitter,  
204 and Meetup.

205 After the application deadline, Busby reviewed the applicants for minimum necessary  
206 experience, and sent the applicants' written statements to team leads, encouraging them to pick  
207 five members and two alternates. Team leads reviewed the 131 qualified applicants and selected  
208 a total of 27 people to fill the four teams of about 6 people each. Members were chosen solely on  
209 the interest and motivational statements on their forms, and credentials and experience were not  
210 further researched. One goal of the hackathon was to bring together scientists with different  
211 expertise. Some of the participants were more traditional bench biologists and some were  
212 bioinformaticists with more computational knowledge. This was a networking experience for  
213 local and international scientists, including two who traveled from Germany and several from  
214 outside of Maryland.

215 Technical professional staff from NCBI, including programmers and system  
216 administrators, were also brought in and "embedded" with the team to facilitate programming  
217 knowledge transfer and debugging. In addition, a librarian from the NIH Library served as an  
218 editor, providing guidance on writing and organization of the manuscript.



219           The teams convened in a large meeting space that had Wi-Fi access, a nearby cafeteria,  
220 plenty of tables to provide adequate room to spread out, and easels with markers for easier team  
221 discussion. Space was available outside of the meeting room if participants needed a quiet space  
222 apart from the larger group. To optimize time available to work on the projects, an hour was set  
223 aside each day for a “working lunch” with the option to order in as a group. There was also an  
224 optional group dinner each night that provided more time to network, socialize, and continue  
225 work on the scientific problems.

226           The schedule was circulated the week prior to the hackathon. The agenda was semi-  
227 structured with time allocated for various activities such as obtaining data, pipeline building, and  
228 code checking. There were several checkpoints for each team to present their progress to the  
229 larger group. A tour of the NCBI data center was conducted, as well as several brief  
230 informational presentations. For example, Eugene Yaschenko of NCBI presented a group of  
231 application program interfaces (APIs) relating to the SRA Toolkit collectively known as the  
232 software development kit (26). The schedule was designed to give team members a common  
233 starting point, but allowed for modification as needed for each team.

## 234 **Delegation of roles/responsibilities**

235           One of the first tasks at the hackathon was for each team to assign roles/responsibilities to  
236 the team members. Most of the members were meeting each other for the first time, so it was a  
237 good way to learn about each other’s strengths. Roles were loosely distributed to cover areas  
238 including:

- 239           • Systems administration: decided where data and tools went, implemented git for  
240           versioning, and dealt with any technical issues;
- 241           • Metadata: tracked and recorded the information describing the contents of the datasets;

- 242 • Data Acquisition: located and downloaded appropriate publicly available datasets for  
243 analysis;
- 244 • Data Normalization: prepared data from multiple datasets to work in a pipeline, such as  
245 making read counts comparable between collection sites.
- 246 • Downstream Analysis: assigned annotation or function to genomic predictions and  
247 looked at statistically meaningful overrepresentation
- 248 • Documentation: prepared code and text summaries, including drafting this manuscript.

## 249 **Team Organization and Communication**

250 In order to facilitate communication among team members, Google mail groups were  
251 created for each team. Most team members did not know each other prior to the start of the  
252 hackathon, but some teams used their Google mail group to communicate prior to the event.  
253 Other collaboration tools included GitHub for program version control and Gitter, an instant  
254 messaging tool, for sharing links, especially while teams were looking for datasets. Documents  
255 were collaboratively edited using Google Docs.

## 256 **Data Sources and Computational Tools**

257 The basic workflow for the teams' activities is demonstrated in Fig. 2. Scripting and data  
258 analysis took place in an Amazon Elastic Compute Cloud (EC2) where team players downloaded  
259 data from NCBI repositories and used open source bioinformatic tools. System administrators  
260 (SysAdmin) for each team were charged with code installation, compilation, storage and nodes  
261 expansion while the teams were developing the pipelines, which were pushed to GitHub.

### 262 **Figure 2. Hackathon teams workflow.**

263 *DNA-seq Team*

264           The DNA-seq team acquired high-throughput sequencing data for matched tumor-normal  
265 pairs from the NCBI SRA. The first three datasets found were unusable due to corrupted files,  
266 mismatched samples, or missing header information (see Discussion below for more details).  
267 The data used for designing the DNA-seq pipeline were found by searching the BioProject  
268 database for the terms “homo sapiens NOT cell line,” filtering for exome and SRA datasets, and  
269 rejecting the 81 datasets that matched the term “HapMap”.

270           We designed our pipeline around a publicly available exome dataset submitted to SRA,  
271 BioProject PRJNA268172 (27). It consisted of exome sequences from four meningioma samples  
272 and a peripheral blood DNA sample from a 61-year-old female suffering from sporadic multiple  
273 meningiomas. Meningiomas are tumors originating from the membranous layers surrounding the  
274 central nervous system and are generally considered benign. Malignant meningiomas, while rare,  
275 are associated with a higher risk of local tumor recurrence and have a median survival time of  
276 less than two years (28). We were interested in finding and comparing somatic mutations,  
277 specifically SNPs, found in each of the meningioma tumor samples from the patient.

278           We downloaded the relevant files by using the SRA Toolkit, and converted the SRA files  
279 to SAM and BAM files for further analysis. We found that the SAM files contained reads with  
280 sequence and quality scores of different length, which would halt the BAM file conversion, so  
281 we added a filter in our pipeline to remove such reads. Ideally, a module for trimming/masking  
282 and re-aligning the FASTQ file would have been the most appropriate; however, due to time  
283 restrictions we were unable to add such a module to our pipeline. Here, we assumed that the  
284 SRA submitted files were properly aligned and followed appropriate quality control steps.

285           We used five different algorithms to call somatic variants. Four of these were in the Cake  
286 pipeline (29), namely Bambino (11), CaVEMan (30), SAMtools mpileup (31), and VarScan2

287 (12). To further increase our confidence in the called variants, we added the MuTect algorithm  
288 (13) to those used by Cake. Xu et al have compared somatic variation calling algorithms (14).

289 A first level of filtering is provided in the pipeline for the resulted VCF files containing  
290 called somatic variants. This was accomplished using the Cake filtering module. We kept most  
291 of the default parameters, and those that were changed are explained in Table 1. Once the VCF  
292 files were filtered, they would be annotated using the ANNOVAR software, downloaded on  
293 January 5th, 2015 (32), with five different databases (RefGene, KnownGene, ClinVar, Cosmid  
294 and Cosmic), and the top 1% most deleterious CADD scores.

295 **Table 1: Cake filtering module parameters modified by the DNA-seq Team.**

| Parameter              | Explanation                                                                                   | Flag or Value Used |
|------------------------|-----------------------------------------------------------------------------------------------|--------------------|
| EXONIC_FILTER          | Exome data is being used                                                                      | FALSE              |
| INDEL_FILTER           | Only SNPs are being considered                                                                | FALSE              |
| COSMIC_ANNOTATION_FLAG | Cosmic Annotations are added with ANNOVAR                                                     | FALSE              |
| TUMOR_MIN_DEPTH        | As the coverage of these samples was too low, we set the threshold to a less stringent value. | 5                  |
| NORMAL_MIN_DEPTH       | As the coverage of these samples was too low, we set the threshold to a less stringent value. | 5                  |
| EMPTY_CONSEQ_FILTER    | VEP annotations were not used                                                                 | FALSE              |

296  
297 To compare the predicted somatic variations between two matched tumor-control  
298 samples, we created a module in our pipeline that used VCFtools to find shared and unique  
299 variations (33). Lastly, we combined these modules into a single pipeline using Bpipe (34), as  
300 well as a Unix Bash script. The full list of software used by the DNA-seq Team is included in  
301 Table 2.

302 **Table 2: Tools and software used by the DNA-seq Team.**

| Software/Tool  | URL                                                                                                                                                     |
|----------------|---------------------------------------------------------------------------------------------------------------------------------------------------------|
| SRA tool kit   | <a href="http://www.ncbi.nlm.nih.gov/sra">http://www.ncbi.nlm.nih.gov/sra</a>                                                                           |
| Cake           | <a href="http://sourceforge.net/projects/cakesomatic/">http://sourceforge.net/projects/cakesomatic/</a>                                                 |
| MuTect         | <a href="https://github.com/broadinstitute/mutect/releases/tag/1.1.5">https://github.com/broadinstitute/mutect/releases/tag/1.1.5</a>                   |
| somatic sniper | <a href="http://gmt.genome.wustl.edu/packages/somatic-sniper/install.html">http://gmt.genome.wustl.edu/packages/somatic-sniper/install.html</a>         |
| varscan        | <a href="http://sourceforge.net/projects/varscan/">http://sourceforge.net/projects/varscan/</a>                                                         |
| bambino        | <a href="https://cgwb.nci.nih.gov/goldenPath/bamview/documentation/index.html">https://cgwb.nci.nih.gov/goldenPath/bamview/documentation/index.html</a> |
| picard         | <a href="http://broadinstitute.github.io/picard/">http://broadinstitute.github.io/picard/</a>                                                           |
| Annovar        | <a href="http://www.openbioinformatics.org/cgi-bin/annovar_download.cgi">http://www.openbioinformatics.org/cgi-bin/annovar_download.cgi</a>             |
| SAMtools       | <a href="http://www.htslib.org/">http://www.htslib.org/</a>                                                                                             |
| bpipe          | <a href="http://github.com/ssadedin/bpipe">http://github.com/ssadedin/bpipe</a>                                                                         |
| Python         | <a href="https://www.python.org/">https://www.python.org/</a>                                                                                           |
| GNU Parallel   | <a href="http://ftp.gnu.org/gnu/parallel/">http://ftp.gnu.org/gnu/parallel/</a>                                                                         |
| VCFTools       | <a href="http://vcftools.sourceforge.net">http://vcftools.sourceforge.net</a>                                                                           |

303

304 *Epigenomics Team*

305 We gathered data with the intention of modeling transcription (mRNA-seq) based on  
306 DNA methylation (RRBS or Bisulfite-seq) and histone states (ChIP-seq). To simplify analysis,  
307 we focused on marks associated with enhancers and their regulatory status: H3K27ac,  
308 H3K4me1, and H3K4me3. Ultimately, we required that included tissues have matching  
309 H3K27ac, RNA-seq and DNA methylation data for preliminary modeling. Data files were drawn  
310 from human cell lines and tissues in the NIH Epigenomic Roadmap that fit our criteria (outlined  
311 in Table 3), from the site's FTP mirror (35) using the rsync command with the -av option. All  
312 files were already aligned, and were required to have been generated using the hg19 reference

313 genome. Several files were identified that appeared to be re-aligned or uncorrected versions of  
314 other downloaded files, and were removed from the analysis. Tissues acceptable for analysis  
315 were identified by using the data matrix view on the Roadmap site, as well as searching for non-  
316 partial datasets with the Data Grid view of the International Human Epigenome Consortium  
317 (IHEC) Data Portal (36). Samples were initially downloaded from ENCODE: Encyclopedia of  
318 DNA Elements (37), but were not included in initial analysis for reasons of uniformity and time.

319 **Table 3: NIH Epigenomic Roadmap Cell Lines/Tissues used by Epigenomics Team**

| Cell/Tissue Type                            |                                                        |
|---------------------------------------------|--------------------------------------------------------|
| H1                                          | Left_Ventricle                                         |
| IMR90                                       | Pancreas                                               |
| CD34_mobilized_primary_cells                | Right_Atrium                                           |
| hESC-derived_CD184+_endoderm_cultured_cells | Sigmoid_Colon                                          |
| HUES64_cell_line                            | Spleen                                                 |
| pancreatic_islets                           | Penis_Foreskin_Fibroblast_Primary_Cells                |
| Skeletal_muscle                             | Penis_Foreskin_Keratinocyte_Primary_Cells              |
| Adrenal_Gland                               | Penis_Foreskin_Melanocyte_Primary_Cells                |
| Aorta                                       | Neurosphere_Cultured_Cells_Ganglionic_Eminence_Derived |
| Esophagus                                   | Brain_Hippocampus_Middle                               |
| Gastric                                     | Ovary                                                  |

320

321 *Metagenomics Team*

322 We designed six pipelines to compare different strategies for identifying and quantifying  
323 viral sequences among human genomic information. The pipelines are:

324 1. Identify and quantify HERV sequences in assembled reads using blastn,

- 325        2. Identify and quantify HERV sequences in non-assembled reads from a human genome  
326            using search tools from NCBI's SRA Toolkit,  
327        3. Identify and quantify HERV sequences in non-assembled reads from a human genome  
328            using a standard blastn search of reads in FASTA format.

329 Pipelines 4-6 repeat pipelines 1-3 to identify all viral sequences within a sample from a human  
330 bacterial microbiome.

331        For pipeline 1, whole genome sequence raw reads of human CEU NA12878 (38) were  
332 obtained from NCBI's SRA database and converted from SRA to FASTQ file format using the  
333 fastq-dump command provided by the SRA Toolkit with default filter settings. The resulting  
334 FASTQ file was moved to an Amazon Elastic Compute Cloud (EC2) node and assembled into  
335 contigs with the ABySS assembler (39, 40). Contigs were used as queries for blastn against a  
336 database consisting of all *Retroviridae* RefSeq genomes that was constructed using the  
337 makeblastdb command. For pipeline 2, the SRA files containing raw reads for NA12878 were  
338 used directly as a database for a SRA blast (blastn\_vdb) using the *Retroviridae* RefSeq genomes  
339 as query. For pipeline 3, the FASTA file of non-assembled reads from pipeline 1 was used as a  
340 query for a blastn search against the database of *Retroviridae* RefSeq genomes from pipeline 1.

341        For pipelines 4 – 6, we used samples from the Human Microbiome Project (HMP) that  
342 had passed preliminary quality checks (41). The plan for pipeline 4 was the same as for pipeline  
343 1, except for using SOAPdenovo2 for the assembly of the microbiome FASTQ reads. For  
344 pipeline 5, rather than start with SRA files, raw Illumina WGS reads in FASTQ format first were  
345 converted to SRA format using the FASTQ loader tool latf-load within the SRA Toolkit.  
346 Pipeline 6 follows pipeline 3, but uses the microbiome FASTA as its query and the total viral  
347 RefSeq genome as its database. Full details about the data and tools we used are located in

348 Tables 4 and 5, respectively.

349 **Table 4. Data sources used by Metagenomics Team**

350

| Data Source                                                | FTP Location                                                                                                                                                                                                            |
|------------------------------------------------------------|-------------------------------------------------------------------------------------------------------------------------------------------------------------------------------------------------------------------------|
| refseq viral                                               | <a href="ftp://ftp.ncbi.nlm.nih.gov/refseq/release/viral">ftp://ftp.ncbi.nlm.nih.gov/refseq/release/viral</a>                                                                                                           |
| 1000 genomes contigs                                       | <a href="ftp://ftp.1000genomes.ebi.ac.uk/vol1/ftp/technical/reference/">ftp://ftp.1000genomes.ebi.ac.uk/vol1/ftp/technical/reference/</a>                                                                               |
| Human microbiome                                           | <a href="ftp://public-ftp.hmpdacc.org/HMASM/PGAs/">ftp://public-ftp.hmpdacc.org/HMASM/PGAs/</a>                                                                                                                         |
| Human microbiome raw reads for right_retroauricular_crease | <a href="ftp://public-ftp.hmpdacc.org/Illumina/right_retroauricular_crease/SRS015381.tar.bz2">ftp://public-ftp.hmpdacc.org/Illumina/right_retroauricular_crease/SRS015381.tar.bz2</a>                                   |
| Homo_sapiens_dna                                           | <a href="ftp://ftp.ensembl.org/pub/current_fasta/homo_sapiens/dna/Homo_sapiens.GRCh38.dna.chromosome.10.fa.gz">ftp://ftp.ensembl.org/pub/current_fasta/homo_sapiens/dna/Homo_sapiens.GRCh38.dna.chromosome.10.fa.gz</a> |

351

352 **Table 5: Tools and software used by the Metagenomics Team.**

| Software/Tool                      | URL                                                                                                                                                 |
|------------------------------------|-----------------------------------------------------------------------------------------------------------------------------------------------------|
| SRAToolkit                         | <a href="http://www.ncbi.nlm.nih.gov/Traces/sra/?view=software">http://www.ncbi.nlm.nih.gov/Traces/sra/?view=software</a>                           |
| ABYSS (from source, version 1.5.2) | <a href="http://www.bcgsc.ca/platform/bioinfo/software/abyss/releases/1.5.2">http://www.bcgsc.ca/platform/bioinfo/software/abyss/releases/1.5.2</a> |
| R statistical package              | <a href="http://www.r-project.org/">http://www.r-project.org/</a>                                                                                   |
| BLAST+                             | <a href="ftp://ftp.ncbi.nlm.nih.gov/blast/executables/blast+/LATEST/">ftp://ftp.ncbi.nlm.nih.gov/blast/executables/blast+/LATEST/</a>               |

353

354 *RNA-seq Team*

355 The RNA-seq Team determined that the samples initially suggested by the team lead  
356 were not appropriate, so we looked for paired tumor/normal datasets from the NCBI Sequence  
357 Read Archive (SRA). One dataset was a deep high-throughput transcriptome sequencing (RNA-  
358 seq) performed on three pairs of matched tumor and adjacent non-tumors (NT) tissues from HCC



359 patients of Chinese origin, accession PRJNA149267 (42, 43) Another identified dataset was a  
360 study to identify a prognostic signature in colorectal cancer (CRC) patients with diverse  
361 progression and heterogeneity of CRCs, accession PRJNA218851 (44, 45). Thirty-six paired  
362 samples from this study (18 tumor samples: GSM1228184-GSM1228201 and 18 matched  
363 normal samples GSM1228202-GSM1228219) were also determined to suitable. Additional tools  
364 used by the RNA-seq Team are listed in Table 6.

365 **Table 6: Tools and software used by the RNA-seq Team.**

| Software/Tool    | URL                                                                                                                                                           |
|------------------|---------------------------------------------------------------------------------------------------------------------------------------------------------------|
| HISAT            | <a href="http://www.ccb.jhu.edu/software/hisat/index.shtml">http://www.ccb.jhu.edu/software/hisat/index.shtml</a>                                             |
| Illumina iGenome | <a href="http://support.illumina.com/sequencing/sequencing_software/igenome.html">http://support.illumina.com/sequencing/sequencing_software/igenome.html</a> |
| Bowtie           | <a href="http://bowtie-bio.sourceforge.net/index.shtml">http://bowtie-bio.sourceforge.net/index.shtml</a>                                                     |
| tophat           | <a href="http://ccb.jhu.edu/software/tophat/index.shtml">http://ccb.jhu.edu/software/tophat/index.shtml</a>                                                   |
| Bambino          | <a href="https://cgwb.nci.nih.gov/goldenPath/bamview/documentation/index.html">https://cgwb.nci.nih.gov/goldenPath/bamview/documentation/index.html</a>       |
| SAMtools         | <a href="http://SAMtools.sourceforge.net/">http://SAMtools.sourceforge.net/</a>                                                                               |
| SRA Toolkit      | <a href="http://www.ncbi.nlm.nih.gov/Traces/sra/?view=software">http://www.ncbi.nlm.nih.gov/Traces/sra/?view=software</a>                                     |
| R                | <a href="http://www.r-project.org/">http://www.r-project.org/</a>                                                                                             |
| python           | <a href="https://www.python.org/">https://www.python.org/</a>                                                                                                 |
| perl             | <a href="http://www.perl.org/">http://www.perl.org/</a>                                                                                                       |

366

## 367 **Results**

### 368 **Evolution of the Projects**

#### 369 *DNA-seq team*

370 Our initial goal was to build a bioinformatics pipeline to predict somatic mutations using

371 several calling algorithms and integrate the mutations with RNA-seq data to find eQTLs.  
372 However, one of the main hurdles we encountered was finding an appropriate dataset that could  
373 be used to test and help create our pipeline. Initially, we found a neuroblastoma dataset  
374 submitted to SRA that included both the exome and RNA-seq data for matched samples.  
375 However, the dataset was unusable because of corrupted files. The majority of our time at the  
376 hackathon was spent on finding an appropriate dataset and debugging issues with the publicly  
377 available files. This hindered our efforts to create a fully functional pipeline to achieve our goals.  
378 Due to a lack of a working dataset of both DNA-seq and RNA-seq from the same individuals, we  
379 were unable to write a module within our pipeline to find eQTLs. However, we were able to  
380 design a pipeline that would find somatic mutations using five calling algorithms for given  
381 matched samples using five different algorithms, filter and annotate mutations, and find shared  
382 and unique mutations between two matched sample pairs (see Methods for more details).

### 383 *Epigenomics Team*

384 We initially considered different scenarios in which a lab might utilize our proposed  
385 pipeline based upon their available datasets and how investigators might want to model their  
386 datasets. For example, investigators might want to find a relationship between DNA methylation  
387 levels and histone enrichment. Given the variation in epigenetic data available as part of publicly  
388 available datasets, we recognized the need for flexibility about which data components would be  
389 required to model different epigenetic relationships. Time limitations prevented us from  
390 generating a workflow for every potential scenario (for example, RNA-seq and ChIP-seq, or  
391 ChIP-seq and DNA methylation but no RNA-seq). Instead, we considered common questions  
392 that might interest a general epigenetics laboratory. Investigators with epigenetic data often want  
393 to understand how this data correlates to gene expression. Thus, we decided to focus our model

394 on elucidating relationships between a given variable collection of epigenetic data and gene  
395 expression. A lab can use publicly available datasets to create a model with which to test their  
396 own epigenetic data.

397 *Metagenomics Team*

398 We considered several different options for metagenomics searches before the final six  
399 pipelines were settled. We spent significant time discussing the requirements for filtering or  
400 other QC steps on raw reads prior to running assembly (pipelines 1 and 4) or SRA blast steps.  
401 We also debated the relative merits of assembly for each task, eventually deciding to compare  
402 searches with and without assembly in different pipelines, which significantly added to our  
403 workload and may have contributed to the fact that only two pipelines were completed during the  
404 hackathon. With regard to assembly, our group considered using the established MG-RAST  
405 pipeline for a “brute force” blastn into raw reads (46), as well as using metAMOS (47), a  
406 comprehensive pipeline for metagenomics analysis for comparison. Eventually we decided to  
407 forego established pipelines, due to computational requirements within the timeframe of the  
408 hackathon and the desire to focus on developing novel workflows of our own.

409 For pipelines 1-3 we initially planned to use human genomic information from 1000  
410 Genomes (24) but found the format (base genomic sequence with list of variants) more difficult  
411 to handle for our purposes than the human CEU NA12878 data that we eventually used.  
412 Likewise, for the microbiome task, we initially planned to apply our pipelines to several  
413 microbiome sample types, but eventually decided to focus on a skin microbiome, since skin  
414 samples tend to contain abundant viruses and multiple datasets may be available due to ease of  
415 sampling.

416 *RNA-seq Team*

417       Our original goals were very ambitious, especially the task of determining RNA editing  
418 without DNA controls. We were interested in looking at the variants in paired cancer samples,  
419 and spent a fair amount of time to find an appropriate dataset. We decided to align the samples  
420 using HISAT and determine the types and counts of variants (particularly A-I transitions) that  
421 may suggest RNA editing. We also wanted to determine variants in genes and then possibly  
422 correlate the genes to Gene Ontology.

423       We discussed a variety of aligners, such as STAR (48) and HISAT (49), which are very  
424 fast. Information about the recently released HISAT program was shared via the Google Group  
425 prior to the start of the hackathon so everyone had a chance to review this program. We selected  
426 HISAT because of its speed, a decision partly driven by the time constraints of the hackathon.  
427 We encountered some technical difficulties processing these in HISAT, so we ran the dataset  
428 with the 3 pairs of tumor/normal using tophat and bowtie so that we had some results for  
429 downstream processing, while another team member continued to develop the HISAT portion of  
430 the pipeline.

431       We selected bambino as our variant caller based on team members' past successes with  
432 using this tool. A collection of Python and Perl scripts was written to filter out unmapped and  
433 low-quality reads and, more importantly, multi-mapped reads that did not map to a unique locus  
434 within the genome, since bambino would call each of these multiple alignments separately. The  
435 BAMs also had to be sorted by chromosome to prepare input for bambino. Bambino was then  
436 used to generate a variant call table and a Perl script was created to filter for coverage on both  
437 strands and give a sparser table for downstream analysis. Another program counted the variant  
438 info. We then applied the Fisher's exact test to the data using R.

439 We discussed creating a command line to get gene ontologies of the set of genes, but  
440 were concerned about users keeping up-to-date versions of the GO database. Gene ontology  
441 could be determined by using web sites such as PANTHER (50) or DAVID (51, 52).

## 442 **Technical Problems**

### 443 *DNA-seq Team*

444 We found the SRA website challenging to use for locating data, and the quality of  
445 available datasets was inconsistent. Although many data sources validate user-submitted files, a  
446 number of files that had been improperly validated and thus were not usable. Some files were  
447 corrupted and could not be used, such as those in BioProject PRJNA76777 (53). Our pipeline  
448 needed datasets that had a paired tumor-normal sample from the same patient. For some datasets,  
449 paired samples were not available, and other datasets were marked as being paired, when in fact  
450 they were not, such as BioProject PRJNA217947 (54). In addition, we observed that multiple  
451 datasets in the SRA database were missing the header information required to create BAM files  
452 used by downstream analysis tools, such as BioProject PRJDB1903 (55). In other cases, SRA  
453 data were found to be malformed, and caused certain tools to crash. Specifically, files from  
454 BioProject PRJNA268172 (27) contained reads with differing length sequence and quality scores  
455 (e.g. 34 bases of sequences, 70 bases of quality information). Files with such mismatches cannot  
456 be used in SAMtools to convert to BAM files, as a difference in these field lengths is  
457 inconsistent with the SAM format specification (56).

458 We also encountered problems with upstream bioinformatics code quality, such as poor  
459 or incorrect documentation. The tools we employed had a variety of installation methods, and  
460 few were available for easy installation through a package manager. For example, core software,  
461 such as R version 3, was not available as a package from the operating system vendor. Installing

462 from a third-party repository is not complex, but may be daunting to someone inexperienced in  
463 systems administration.

464 *Epigenomics Team*

465         When searching for epigenetic datasets that belong to a given cell type, we found that in  
466 many cases all of the necessary data were not available in one centralized location. Thus, we had  
467 to search through multiple websites and databases to find enough epigenetic data for a given cell  
468 type we wanted to model. In some cases, the metadata for a given file was either corrupt or  
469 unavailable. In other cases, the assembly used to align reads for a given set of files was not  
470 clearly indicated, so these files were discarded. When dealing with wiggle (wig) and bigWig  
471 files, sometimes the format of the file was inconsistent and needed to be edited on the fly.

472 *Metagenomics Team*

473         Technical difficulties generally were resolved expediently, but still hindered timely  
474 analysis within the hackathon context. For example, some Amazon EC2 nodes would suddenly  
475 become completely unresponsive for unexplained reasons, requiring that we shut down and re-  
476 initiate the nodes. By the end of the hackathon, results were only available from the pipelines  
477 that used the SRA BLAST, in part because the SRA BLAST took about an order of magnitude  
478 less computing time than the standard blast program. In both cases, many Amazon compute  
479 nodes were available, but only the SRA BLAST was able to handle the large volume of human  
480 genome and human microbiome read data efficiently. In contrast, a huge amount of the  
481 processing power available to the standard blast program (several tens of nodes) was simply  
482 wasted while the program waited for data.

483 *RNA-seq Team*

484           It is important to recognize the difficulties of variant calling, especially with RNA-seq  
485 data. First, bias impacts genes expressed at lower levels. As gene expression itself varies from  
486 sample to sample, depth of coverage for any particular variant may differ. For instance, a variant  
487 in a sample with high gene expression would be called without difficulties, but may not be called  
488 in a sample that also carries the variant but whose expression is too low to call with confidence.  
489 Another source of variance lies within the heterogeneity of the tissue sample. Most tissue  
490 samples harbor multiple cell types, and not all of these cells will carry a somatic mutation. This  
491 problem is encountered in both DNA-seq and RNA-seq data, but results can be difficult to  
492 interpret on a per-variant basis when the fluctuation in overall coverage in gene expression is  
493 also considered. Thus, we decided to deal with overall global effects rather than selecting  
494 particular singular changes.

## 495 **Project Results**

### 496 *DNA-seq Team*

497           The test dataset was downloaded from SRA website. The SRA Toolkit utility called  
498 prefetch allows the user to download SRA data files, but we found it initially troublesome to use  
499 due to configuration and storage issues; by default, prefetch stores all files in user home  
500 directories, which are often limited in storage capacity. We therefore wrote a faster web-scraping  
501 script to download the files from the SRA website. Given our time limitations, we had to rely on  
502 the user-submitted aligned and trimmed files, but we recommend that files submitted to the SRA  
503 should be validated prior to upload.

504           Our pipeline was designed to find somatic mutations using five different algorithms, filter  
505 and annotate the mutations, and compare the predicted mutations between matched tumor-  
506 normal samples. However, due to time constraints and initial difficulties with finding an

507 appropriate data set and software installation, we were unable to complete our analysis. A  
508 diagram of the final DNA-seq Team pipeline design is presented in Fig 3.

509 **Figure 3. DNA-seq Team pipeline.**

510 *Epigenomics Team*

511 We sought to rectify previously described inconsistencies in analyses by developing a  
512 more efficient, novel pipeline. Our pipeline uses RNA-seq counts, ChIP-seq peaks, and DNA  
513 methylation data in order to generate a model to predict relationships between gene expression  
514 and epigenetic data. These models can then be used to predict changes in gene expression with  
515 respect to changes in these epigenetic signals. Publicly available datasets can be utilized to  
516 generate a model, which investigators can then use to predict the state of the chromatin based on  
517 their own epigenetic data. The pipeline uses a combination of Python, R, and command line-  
518 based tools.

519 For each gene in a given cell type, epigenetic marks positioned locally to the gene are  
520 considered, as are distal enhancer elements that may also play in a role in that gene's expression.  
521 To calculate the local epigenetic effects on transcription, an arbitrary distance on the 5' and 3'  
522 ends of a gene is binned into regions and the scores of epigenetic marks that reside in each of  
523 these bins are collected. The distal effect of transcription on a given gene is given by peak scores  
524 of enhancer elements that are at most one megabase (Mb) upstream or downstream of the gene.

525 The scores for each epigenetic mark and enhancer for a given gene are standardized and  
526 stored in a data matrix, where each row corresponds to a given gene for a given sample condition  
527 or cell type. Transcript gene counts generated from RNA-seq data are also stored. This pipeline  
528 generates a unique model for each gene in a given cell type by considering the gene count values  
529 as Y-values and each of the epigenetic scores as X-values. Corresponding coefficients are



530 calculated for each X-value. Investigators can use these coefficients to input a new set of  
531 epigenetic data and receive a testable hypothesis of predicted levels of expression for each gene  
532 based on the new epigenetic data. Over time, different datasets can be used to train a given  
533 model to make it more reliable. A diagram of the final DNA-seq Team pipeline is presented in  
534 Fig 4.

535 **Figure 4. Epigenomics Team pipeline.**

536 *Metagenomics Team*

537 Although the goals were similar across all six of our pipelines, differences in file formats  
538 and analysis approaches between the pipelines required the team to split their efforts rather than  
539 work together on a single pipeline. One result of this fragmentation was some lack of consistency  
540 in analytical methods (for example, choice of query versus database) between the pipelines.  
541 Moreover, due to time limitations of the hackathon only one assembly was completed: the  
542 ABySS assembly of the NA12878 human genome. Likewise, while we completed a versatile  
543 script for conversion of FASTQ files to SRA format with the latf-load tool, time allowed only for  
544 its demonstration on a single human microbiome sample.

545 Initially our plan included comparison of ERV sequence abundances between NA12878  
546 genomes sequenced by several different sequencing technologies. Likewise, we initially planned  
547 to compare viral sequence abundances between several different microbiome sample types. Due  
548 to the complexity of these tasks, we decided to demonstrate our pipelines with a single sample  
549 type for each application: Illumina HiSeq 2000 reads from NA12878 and a single sample from  
550 the right retroauricular crease for the HMP application. Of the six pipelines that were planned  
551 and designed, we built four (pipelines 1-3 and 5).

552 We found that the most successful approach for searching a human genome for

553 endogenous retroviruses was to use reads converted to SRA format (pipeline 2) via latf-load. The  
554 blastn in pipeline 2 was completed in 50-60 minutes. For pipeline 1, while an assembly of  
555 NA12878 was completed using ABySS within the time constraints of the hackathon, the blastn  
556 search using the assembled contigs to query the ERV database required excessive computational  
557 time; after more than 4 hours using 30 cores, the search still had not finished. In contrast, the  
558 blastn for pipeline 3 finished in 5 hours. Part of the increased time for the blastn search in  
559 pipeline 3 may have been due to alteration of the FASTA database by merging of forward and  
560 reverse paired-ends.

561 Pipeline 5 includes a set of scripts that we developed to create a versatile pipeline for  
562 searching a human microbiome sample for all viruses. These scripts may be adjusted to conduct  
563 BLAST searches using other types of SRA files. A shell script downloads the relevant datasets  
564 for the assembled and non-assembled sequences from HMP as well as for total viral sequences  
565 from RefSeq. Scripts and a wrapper, written in R, were developed to convert FASTQ data to  
566 SRA format with the latf-loader tool, convert the loaded data to .kar format, run a BLAST search  
567 with the blast\_vdb command, and parse the data into a viral-by-sample count matrix. The  
568 resulting sparse matrix may be normalized and handled in a way similar to previously published  
569 methods for sparse matrices of high-throughput 16S survey data (21). Additional available code  
570 executes blastn on the assembled contigs. A diagram of the final Metagenomics Team pipeline is  
571 presented in Fig 5.

572 **Figure 5: Metagenomics Team pipeline.**

573 *RNA-seq Team*

574 We developed and ran a Python script that reads a user-defined manifest file to extract  
575 the read sequence information from the SRA files, stores the data in FASTQ format, and

576 launches the jobs to align the sequences using HISAT. Due to technical difficulties and time  
577 constraints, we decided to manually download and process a smaller set of 3 pairs of  
578 tumor/normal samples, as opposed to the set of 18 pairs we had initially considered. We aligned  
579 the sequences using HISAT to prepare the data for use in subsequent parts of the pipeline. The  
580 aligned SAM files were filtered to remove the unmapped, low-quality or ambiguous reads, such  
581 as reads that map at multiple different locations.

582         The filtered data were run through bambino to create a variant call table in which each  
583 line contains a call variant at a particular location within the genome and the reference base at  
584 the same location. We counted nucleotide change variants in the tumor and normal samples and  
585 ran a Fisher's exact statistical test using R to identify potential RNA editing. We found no  
586 significant global changes of overrepresentation, but it is important to recognize the limitations  
587 of our small sample size and our focus on specific changes. RNA editing most likely only  
588 comprises a small number of A to G variants, and we would not be able to identify these changes  
589 by considering global total numbers as opposed to looking at each site's overall counts  
590 individually. This limitation does not affect overrepresentation in a global manner, but a small  
591 set of specific local changes might not be identified with this study design.

592         Before the end of the hackathon, we were able to use the initial Python script to  
593 download all 36 samples and launch the alignment tool jobs, but were able to complete fewer  
594 than 10 samples given the amount of time required to finish debugging. However, when  
595 completed, this automation script will greatly simplify the process of accessing and launching of  
596 alignment jobs for RNA-seq datasets. A diagram of the final RNA-seq Team pipeline is  
597 presented in Fig 6.

598 **Figure 6: RNA-seq Team pipeline.**

## 599 **Discussion and Conclusions**

600 Feedback from hackathon participants was generally positive, and the enthusiasm that  
601 participants felt was evident during the event. Participants voluntarily stayed past the planned  
602 ending time each night, and many participants did not even want to take a break when lunch  
603 arrived. Even more than a week after the hackathon had ended, teams continued to  
604 communicate about and work on the problems, as well as this paper.

605 Every participant in the hackathon contributed not only to the research but also to  
606 drafting the paper. Each group appointed a lead writer, who worked closely with the librarian  
607 editor and coordinated with the other members of their team. Because each of the team members  
608 worked on different parts of the project, every individual wrote at least a portion of the sections  
609 of the paper covering their work. The use of Google Docs allowed multiple authors to work on  
610 the paper simultaneously and all changes to be reflected in real time. Google Docs' comment  
611 functionality also facilitated communication among authors. Once the writing was considered  
612 complete, the librarian editor organized and edited the draft in order to create a coherent and  
613 consistent paper, then returned this final draft to all authors for their approval. Though  
614 coordinating with so many authors is challenging, here we demonstrated that it is possible for a  
615 large group of individuals to contribute substantively to an article.

616 Participants reported that they appreciated having structured roles within the teams. Team  
617 leads were also important for the success of the team, though their presence was not necessary  
618 for the entire hackathon. For example, inclement weather on the second day prevented one of the  
619 team leads from attending, but the team still made progress on pipeline production. Given that  
620 members of each team came from diverse backgrounds with experience working with a  
621 multitude of different data types and resources, the hackathon promoted innovation through team

622 science and consensus-building. For example, it was essential that each pipeline utilize an  
623 appropriate test dataset, but many teams had difficulty with data that were located across  
624 multiple repositories or could not be used due to errors in metadata or formatting. Thus, teams  
625 had to brainstorm other datasets to use or create new ways to process the data. Because each  
626 problem encompassed technical challenges inherent in many biological fields, teams needed to  
627 consolidate ideas from each member. This allowed teams to not only transcend the difficult data  
628 landscape, but fostered a strong learning environment.

629         Although the ultimate goal of the hackathon was to solve biological problems,  
630 participants emphasized that they appreciated this unique opportunity for career development  
631 and networking. Participants with strong backgrounds in computer science effectively mentored  
632 those who were less computationally savvy, and those with strong biology backgrounds were  
633 able to share insights with those who lacked this expertise. Additionally, the hackathon brought  
634 together individuals from different research communities who otherwise may have never met and  
635 created the potential for establishing new collaborations. In particular, participants early in their  
636 careers were able to meet prominent researchers in various fields and receive helpful training  
637 advice from the more senior participants. We anticipate that the participants will share their  
638 experiences upon returning to their respective institutes.

639         The organizers learned some valuable lessons from this event. Surprisingly, although the  
640 organizers had kept the goals somewhat loosely structured, participants generally asked for more  
641 structure, particularly concerning datasets. In the future, the organizers intend to prepare videos  
642 for team members concerning the scientific directions of the projects prior to the event. Other  
643 informational materials distributed in advance of the event could help participants learn how to  
644 complete tasks that took time away from pipeline development, such as how to locate and

645 download datasets. Specific attention will be paid to using the SRA SDK to process small parts  
646 of many genomes simultaneously. One team was unable to complete their pipeline, and other  
647 teams were affected by time constraints, so moving some of the preparatory work of locating and  
648 downloading datasets would help ensure that the teams had adequate time for more substantive  
649 work on the pipelines.

650 From an institutional perspective, the hackathon was also helpful as a means to test NCBI  
651 public data repositories. Over the course of this hackathon, several technical issues with respect  
652 to data storage, metadata and corruptions were illuminated. These issues as well as constructive  
653 feedback about how NCBI should host data were discussed directly with NCBI Director David  
654 Lipman.

655 Finally, we hope that this hackathon will help to stimulate the community to continue to  
656 improve these pipelines. We chose these topics and questions because they are of interest to  
657 many biologists and introductory bioinformaticians. Because the data is publicly available,  
658 investigators should be able to access the datasets from NCBI in order to replicate the work done  
659 in creating these pipelines. We encourage members of the community to extend, expand and alter  
660 these pipelines, which are licensed under a Creative Commons Attribution License (CC-BY). We  
661 hope that the community will continue working with these pipelines to suit their needs and repost  
662 them as they see fit.

## 663 **Acknowledgements**

665 Shamira Shallom helped document parts of DNA-seq Team progress. Michelle Dunn, Don  
666 Preuss, Julia Oh, and Matt Shirley helped with planning the event. Phi Ngo and other members  
667 of the NCBI administrative team provided additional support during the event. Kurt Rodarmer  
668 and Wolfgang Goetz provided guidance on the SRA toolkit, and Tom Madden provided

669 guidance about BLAST.

670

## 671 **References**

- 672 1. Schadt EE, Linderman MD, Sorenson J, Lee L, Nolan GP. Computational solutions to large-scale  
673 data management and analysis. *Nature reviews Genetics*. 2010;11(9):647-57. doi: 10.1038/nrg2857.  
674 PubMed PMID: PMC3124937.
- 675 2. Strauss KA, Puffenberger EG, Morton DH. One Community's Effort to Control Genetic Disease.  
676 *American Journal of Public Health*. 2012;102(7):1300-6. doi: 10.2105/AJPH.2011.300569. PubMed PMID:  
677 PMC3477994.
- 678 3. Dewey FE, Grove ME, Pan C, Goldstein BA, Bernstein JA, Chaib H, et al. Clinical interpretation  
679 and implications of whole-genome sequencing. *Jama*. 2014;311(10):1035-45. Epub 2014/03/13. doi:  
680 10.1001/jama.2014.1717. PubMed PMID: 24618965; PubMed Central PMCID: PMC4119063.
- 681 4. Palomaki GE, Melillo S, Neveux L, Douglas MP, Dotson WD, Janssens AC, et al. Use of genomic  
682 profiling to assess risk for cardiovascular disease and identify individualized prevention strategies--a  
683 targeted evidence-based review. *Genetics in medicine : official journal of the American College of  
684 Medical Genetics*. 2010;12(12):772-84. Epub 2010/11/04. doi: 10.1097/GIM.0b013e3181f8728d.  
685 PubMed PMID: 21045709.
- 686 5. Celi LA, Ippolito A, Montgomery RA, Moses C, Stone DJ. Crowdsourcing Knowledge Discovery  
687 and Innovations in Medicine. *Journal of Medical Internet Research*. 2014;16(9):e216. doi:  
688 10.2196/jmir.3761. PubMed PMID: PMC4180345.
- 689 6. The Health 2.0 Developer Challenge. Health 2.0's Washington DC HD&IW Code-a-thon:  
690 Preventing Obesity 2012 [cited 2015 January 13]. Available from:  
691 <http://www.health2con.com/devchallenge/washington-dcs-hdi-code-a-thon-preventing-obesity/>.
- 692 7. Illumina. Illumina BaseSpace Worldwide Developers Conference (WWDC) 2014 [cited 2015  
693 January 13]. Available from: [http://eventregistration.illumina.com/events/illumina-basespace-  
694 worldwide-developers-conference-at-embl-heidelberg/event-summary-  
695 3fd0d62eb6d94cc2bc017d682e9bca51.aspx](http://eventregistration.illumina.com/events/illumina-basespace-worldwide-developers-conference-at-embl-heidelberg/event-summary-3fd0d62eb6d94cc2bc017d682e9bca51.aspx).
- 696 8. HelpMeViz. Hackathon: Women's Empowerment & Nutrition 2014 [cited 2015 January 13].  
697 Available from: <http://helpmeviz.com/2014/06/28/hackathon-womens-empowerment-nutrition/>.
- 698 9. DePasse JW, Carroll R, Ippolito A, Yost A, Santorino D, Chu Z, et al. Less noise, more hacking:  
699 how to deploy principles from MIT's hacking medicine to accelerate health care. *International journal of  
700 technology assessment in health care*. 2014;30(3):260-4. Epub 2014/08/07. doi:  
701 10.1017/s0266462314000324. PubMed PMID: 25096225.
- 702 10. Cancer Genome Atlas Research Network. Comprehensive genomic characterization of squamous  
703 cell lung cancers. *Nature*. 2012;489(7417):519-25. Epub 2012/09/11. doi: 10.1038/nature11404.  
704 PubMed PMID: 22960745; PubMed Central PMCID: PMC4119063.
- 705 11. Edmonson MN, Zhang J, Yan C, Finney RP, Meerzaman DM, Buetow KH. Bambino: a variant  
706 detector and alignment viewer for next-generation sequencing data in the SAM/BAM format.  
707 *Bioinformatics (Oxford, England)*. 2011;27(6):865-6. Epub 2011/02/01. doi:  
708 10.1093/bioinformatics/btr032. PubMed PMID: 21278191; PubMed Central PMCID: PMC3051333.
- 709 12. Koboldt DC, Zhang Q, Larson DE, Shen D, McLellan MD, Lin L, et al. VarScan 2: somatic mutation  
710 and copy number alteration discovery in cancer by exome sequencing. *Genome research*.



- 711 2012;22(3):568-76. Epub 2012/02/04. doi: 10.1101/gr.129684.111. PubMed PMID: 22300766; PubMed  
712 Central PMCID: PMCPmc3290792.
- 713 13. Cibulskis K, Lawrence MS, Carter SL, Sivachenko A, Jaffe D, Sougnez C, et al. Sensitive detection  
714 of somatic point mutations in impure and heterogeneous cancer samples. *Nature biotechnology*.  
715 2013;31(3):213-9. Epub 2013/02/12. doi: 10.1038/nbt.2514. PubMed PMID: 23396013; PubMed Central  
716 PMCID: PMCPmc3833702.
- 717 14. Xu H, DiCarlo J, Satya RV, Peng Q, Wang Y. Comparison of somatic mutation calling methods in  
718 amplicon and whole exome sequence data. *BMC genomics*. 2014;15:244. Epub 2014/04/01. doi:  
719 10.1186/1471-2164-15-244. PubMed PMID: 24678773; PubMed Central PMCID: PMCPmc3986649.
- 720 15. Pallen MJ. Diagnostic metagenomics: potential applications to bacterial, viral and parasitic  
721 infections. *Parasitology*. 2014;141(14):1856-62. Epub 2014/03/01. doi: 10.1017/s0031182014000134.  
722 PubMed PMID: 24576467; PubMed Central PMCID: PMCPmc4255322.
- 723 16. Barbulescu M, Turner G, Seaman MI, Deinard AS, Kidd KK, Lenz J. Many human endogenous  
724 retrovirus K (HERV-K) proviruses are unique to humans. *Current biology : CB*. 1999;9(16):861-8. Epub  
725 1999/09/02. PubMed PMID: 10469592.
- 726 17. Wang-Johanning F, Frost AR, Jian B, Epp L, Lu DW, Johanning GL. Quantitation of HERV-K env  
727 gene expression and splicing in human breast cancer. *Oncogene*. 2003;22(10):1528-35. Epub  
728 2003/03/12. doi: 10.1038/sj.onc.1206241. PubMed PMID: 12629516.
- 729 18. Pop M, Walker AW, Paulson J, Lindsay B, Antonio M, Hossain MA, et al. Diarrhea in young  
730 children from low-income countries leads to large-scale alterations in intestinal microbiota composition.  
731 *Genome biology*. 2014;15(6):R76. Epub 2014/07/06. doi: 10.1186/gb-2014-15-6-r76. PubMed PMID:  
732 24995464; PubMed Central PMCID: PMCPmc4072981.
- 733 19. Reyes A, Haynes M, Hanson N, Angly FE, Heath AC, Rohwer F, et al. Viruses in the faecal  
734 microbiota of monozygotic twins and their mothers. *Nature*. 2010;466(7304):334-8. Epub 2010/07/16.  
735 doi: 10.1038/nature09199. PubMed PMID: 20631792; PubMed Central PMCID: PMCPmc2919852.
- 736 20. Waller AS, Yamada T, Kristensen DM, Kultima JR, Sunagawa S, Koonin EV, et al. Classification and  
737 quantification of bacteriophage taxa in human gut metagenomes. *The ISME journal*. 2014;8(7):1391-  
738 402. Epub 2014/03/14. doi: 10.1038/ismej.2014.30. PubMed PMID: 24621522; PubMed Central PMCID:  
739 PMCPmc4069399.
- 740 21. Paulson JN, Stine OC, Bravo HC, Pop M. Differential abundance analysis for microbial marker-  
741 gene surveys. *Nature methods*. 2013;10(12):1200-2. Epub 2013/10/01. doi: 10.1038/nmeth.2658.  
742 PubMed PMID: 24076764; PubMed Central PMCID: PMCPmc4010126.
- 743 22. Han L, Vickers KC, Samuels DC, Guo Y. Alternative applications for distinct RNA sequencing  
744 strategies. *Briefings in bioinformatics*. 2014. Epub 2014/09/24. doi: 10.1093/bib/bbu032. PubMed PMID:  
745 25246237.
- 746 23. Antonarakis ES, Lu C, Wang H, Lubner B, Nakazawa M, Roeser JC, et al. AR-V7 and resistance to  
747 enzalutamide and abiraterone in prostate cancer. *The New England journal of medicine*.  
748 2014;371(11):1028-38. Epub 2014/09/04. doi: 10.1056/NEJMoa1315815. PubMed PMID: 25184630;  
749 PubMed Central PMCID: PMCPmc4201502.
- 750 24. Abecasis GR, Auton A, Brooks LD, DePristo MA, Durbin RM, Handsaker RE, et al. An integrated  
751 map of genetic variation from 1,092 human genomes. *Nature*. 2012;491(7422):56-65. Epub 2012/11/07.  
752 doi: 10.1038/nature11632. PubMed PMID: 23128226; PubMed Central PMCID: PMCPmc3498066.
- 753 25. National Center for Biotechnology Information. ClinVar 2015 [cited 2015 January 13]. Available  
754 from: <http://www.ncbi.nlm.nih.gov/clinvar/>.
- 755 26. National Center for Biotechnology Information. SRA Toolkit 2015 [cited 2015 January 13].  
756 Available from:  
757 <http://www.ncbi.nlm.nih.gov/Traces/sra/sra.cgi?cmd=show&f=software&m=software&s=software>.



- 758 27. National Center for Biotechnology Information. Whole exome sequencing in a case of sporadic  
759 multiple meningiomas 2014 [cited 2015 January 13]. Available from:  
760 <http://www.ncbi.nlm.nih.gov/bioproject/?term=PRJNA268172>.
- 761 28. Perry A, Scheithauer BW, Stafford SL, Lohse CM, Wollan PC. "Malignancy" in meningiomas: a  
762 clinicopathologic study of 116 patients, with grading implications. *Cancer*. 1999;85(9):2046-56. Epub  
763 1999/05/01. PubMed PMID: 10223247.
- 764 29. Rashid M, Robles-Espinoza CD, Rust AG, Adams DJ. Cake: a bioinformatics pipeline for the  
765 integrated analysis of somatic variants in cancer genomes. *Bioinformatics (Oxford, England)*.  
766 2013;29(17):2208-10. doi: 10.1093/bioinformatics/btt371. PubMed PMID: PMC3740632.
- 767 30. Stephens PJ, Tarpey PS, Davies H, Van Loo P, Greenman C, Wedge DC, et al. The landscape of  
768 cancer genes and mutational processes in breast cancer. *Nature*. 2012;486(7403):400-4. Epub  
769 2012/06/23. doi: 10.1038/nature11017. PubMed PMID: 22722201; PubMed Central PMCID:  
770 PMC3428862.
- 771 31. Li H, Handsaker B, Wysoker A, Fennell T, Ruan J, Homer N, et al. The Sequence Alignment/Map  
772 format and SAMtools. *Bioinformatics (Oxford, England)*. 2009;25(16):2078-9. Epub 2009/06/10. doi:  
773 10.1093/bioinformatics/btp352. PubMed PMID: 19505943; PubMed Central PMCID: PMC3723002.
- 774 32. Wang K, Li M, Hakonarson H. ANNOVAR: functional annotation of genetic variants from high-  
775 throughput sequencing data. *Nucleic acids research*. 2010;38(16):e164. Epub 2010/07/06. doi:  
776 10.1093/nar/gkq603. PubMed PMID: 20601685; PubMed Central PMCID: PMC3428862.
- 777 33. Danecek P, Auton A, Abecasis G, Albers CA, Banks E, DePristo MA, et al. The variant call format  
778 and VCFtools. *Bioinformatics (Oxford, England)*. 2011;27(15):2156-8. Epub 2011/06/10. doi:  
779 10.1093/bioinformatics/btr330. PubMed PMID: 21653522; PubMed Central PMCID: PMC3137218.
- 780 34. Sadedin SP, Pope B, Oshlack A. Bpipe: a tool for running and managing bioinformatics pipelines.  
781 *Bioinformatics (Oxford, England)*. 2012;28(11):1525-6. Epub 2012/04/14. doi:  
782 10.1093/bioinformatics/bts167. PubMed PMID: 22500002.
- 783 35. National Center for Biotechnology Information. NIH Epigenomic Roadmap 2015 [cited 2015  
784 January 5]. Available from: <ftp://ftp.ncbi.nlm.nih.gov/pub/geo/DATA/roadmapepigenomics/>.
- 785 36. International Human Epigenome Consortium. IHEC Data Portal 2015 [cited 2015 January 13].  
786 Available from: <http://epigenomesportal.ca/ihec/grid.html>.
- 787 37. ENCODE Consortium. ENCODE: Encyclopedia of DNA Elements 2015 [cited 2015 January 13].  
788 Available from: <https://www.encodeproject.org/>.
- 789 38. National Center for Biotechnology Information. ERX069505: Whole Genome Sequencing of  
790 human CEU NA12878 2015 [cited 2015 January 13]. Available from:  
791 <http://www.ncbi.nlm.nih.gov/sra/ERX069505%5Baccn%5D>.
- 792 39. BC Cancer Agency. ABySS: Assembly By Short Sequences - a de novo, parallel, paired-end  
793 sequence assembler 2014 [cited 2015 January 13]. Available from:  
794 <http://www.bcgsc.ca/platform/bioinfo/software/abyss>.
- 795 40. Simpson JT, Wong K, Jackman SD, Schein JE, Jones SJ, Birol I. ABySS: a parallel assembler for  
796 short read sequence data. *Genome research*. 2009;19(6):1117-23. Epub 2009/03/03. doi:  
797 10.1101/gr.089532.108. PubMed PMID: 19251739; PubMed Central PMCID: PMC2694472.
- 798 41. National Institutes of Health. NIH Human Microbiome Project 2015 [cited 2015 January 13].  
799 Available from: <http://hmpdacc.org/>.
- 800 42. Chan TH, Lin CH, Qi L, Fei J, Li Y, Yong KJ, et al. A disrupted RNA editing balance mediated by  
801 ADARs (Adenosine DeAminases that act on RNA) in human hepatocellular carcinoma. *Gut*.  
802 2014;63(5):832-43. Epub 2013/06/15. doi: 10.1136/gutjnl-2012-304037. PubMed PMID: 23766440;  
803 PubMed Central PMCID: PMC3995272.

- 804 43. National Center for Biotechnology Information. Transcriptome sequencing of human  
805 hepatocellular carcinoma (human) 2011 [cited 2015 January 13]. Available from:  
806 <http://www.ncbi.nlm.nih.gov/bioproject/?term=PRJNA149267>.
- 807 44. Kim SK, Kim SY, Kim JH, Roh SA, Cho DH, Kim YS, et al. A nineteen gene-based risk score classifier  
808 predicts prognosis of colorectal cancer patients. *Molecular oncology*. 2014;8(8):1653-66. Epub  
809 2014/07/23. doi: 10.1016/j.molonc.2014.06.016. PubMed PMID: 25049118.
- 810 45. National Center for Biotechnology Information. Gene expression profiling study by RNA-seq in  
811 colorectal cancer (human) 2013 [cited 2015 January 13]. Available from:  
812 <http://www.ncbi.nlm.nih.gov/bioproject/?term=PRJNA218851>.
- 813 46. Meyer F, Paarmann D, D'Souza M, Olson R, Glass EM, Kubal M, et al. The metagenomics RAST  
814 server - a public resource for the automatic phylogenetic and functional analysis of metagenomes. *BMC*  
815 *bioinformatics*. 2008;9:386. Epub 2008/09/23. doi: 10.1186/1471-2105-9-386. PubMed PMID:  
816 18803844; PubMed Central PMCID: PMCPMC2563014.
- 817 47. Center for Bioinformatics and Computational Biology. metAMOS: assembly and analysis toolkit  
818 for metagenomics 2015 [cited 2015 January 13]. Available from:  
819 <http://cbcb.umd.edu/software/metAMOS>.
- 820 48. Dobin A, Davis CA, Schlesinger F, Drenkow J, Zaleski C, Jha S, et al. STAR: ultrafast universal RNA-  
821 seq aligner. *Bioinformatics (Oxford, England)*. 2013;29(1):15-21. Epub 2012/10/30. doi:  
822 10.1093/bioinformatics/bts635. PubMed PMID: 23104886; PubMed Central PMCID: PMCPMC3530905.
- 823 49. Kim D, Langmead B, Salzberg S. HISAT: Hierarchical Indexing for Spliced Alignment of  
824 Transcripts 2014 2014-01-01 00:00:00.
- 825 50. Mi H, Muruganujan A, Thomas PD. PANTHER in 2013: modeling the evolution of gene function,  
826 and other gene attributes, in the context of phylogenetic trees. *Nucleic acids research*.  
827 2013;41(Database issue):D377-86. Epub 2012/11/30. doi: 10.1093/nar/gks1118. PubMed PMID:  
828 23193289; PubMed Central PMCID: PMCPMC3531194.
- 829 51. Huang da W, Sherman BT, Lempicki RA. Systematic and integrative analysis of large gene lists  
830 using DAVID bioinformatics resources. *Nature protocols*. 2009;4(1):44-57. Epub 2009/01/10. doi:  
831 10.1038/nprot.2008.211. PubMed PMID: 19131956.
- 832 52. Huang da W, Sherman BT, Lempicki RA. Bioinformatics enrichment tools: paths toward the  
833 comprehensive functional analysis of large gene lists. *Nucleic acids research*. 2009;37(1):1-13. Epub  
834 2008/11/27. doi: 10.1093/nar/gkn923. PubMed PMID: 19033363; PubMed Central PMCID:  
835 PMCPMC2615629.
- 836 53. National Center for Biotechnology Information. Sequencing of multiple tumors from a  
837 neuroblastoma patient 2011 [cited 2015 January 13]. Available from:  
838 <http://www.ncbi.nlm.nih.gov/bioproject/?term=PRJNA76777>.
- 839 54. National Center for Biotechnology Information. Homo sapiens exome and transcriptome 2013  
840 [cited 2015 January 13]. Available from: <http://www.ncbi.nlm.nih.gov/bioproject/?term=PRJNA217947>.
- 841 55. National Center for Biotechnology Information. Whole exome analysis of myelodysplastic  
842 syndromes 2014 [cited 2015 January 13]. Available from:  
843 <http://www.ncbi.nlm.nih.gov/bioproject/?term=PRJDB1903>.
- 844 56. The SAM/BAM Format Specification Working Group. Sequence Alignment/Map Format  
845 Specification 2014 [cited 2015 January 13]. Available from: [http://samtools.github.io/hts-](http://samtools.github.io/hts-specs/SAMv1.pdf)  
846 [specs/SAMv1.pdf](http://samtools.github.io/hts-specs/SAMv1.pdf).
- 847

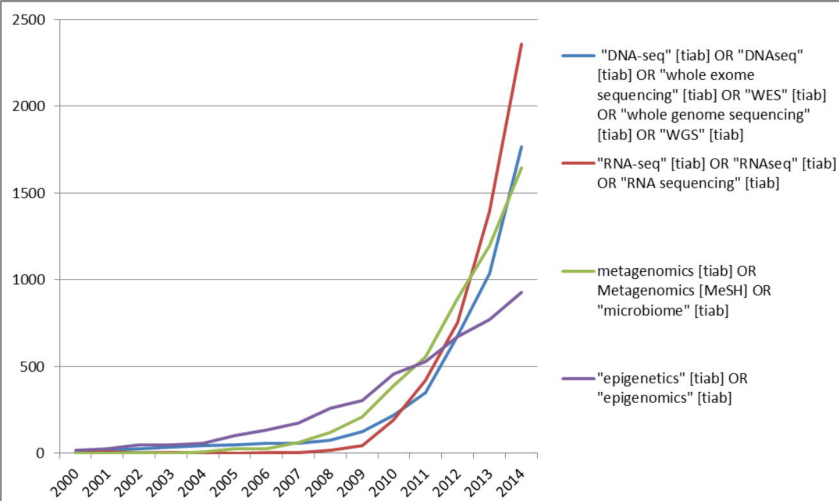

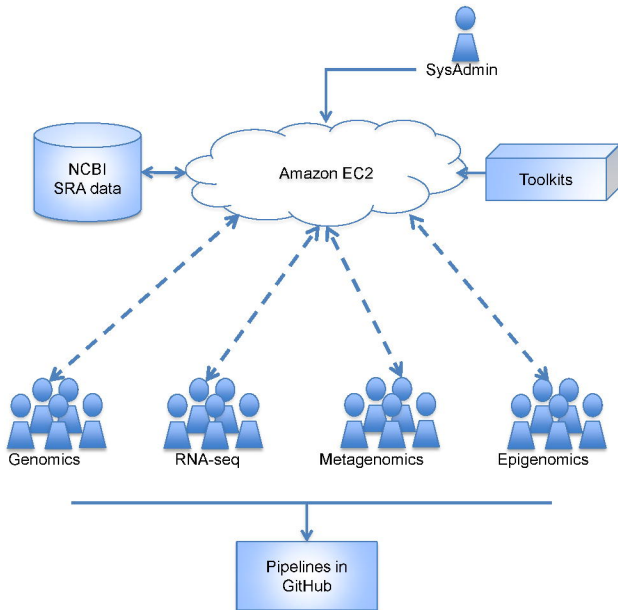

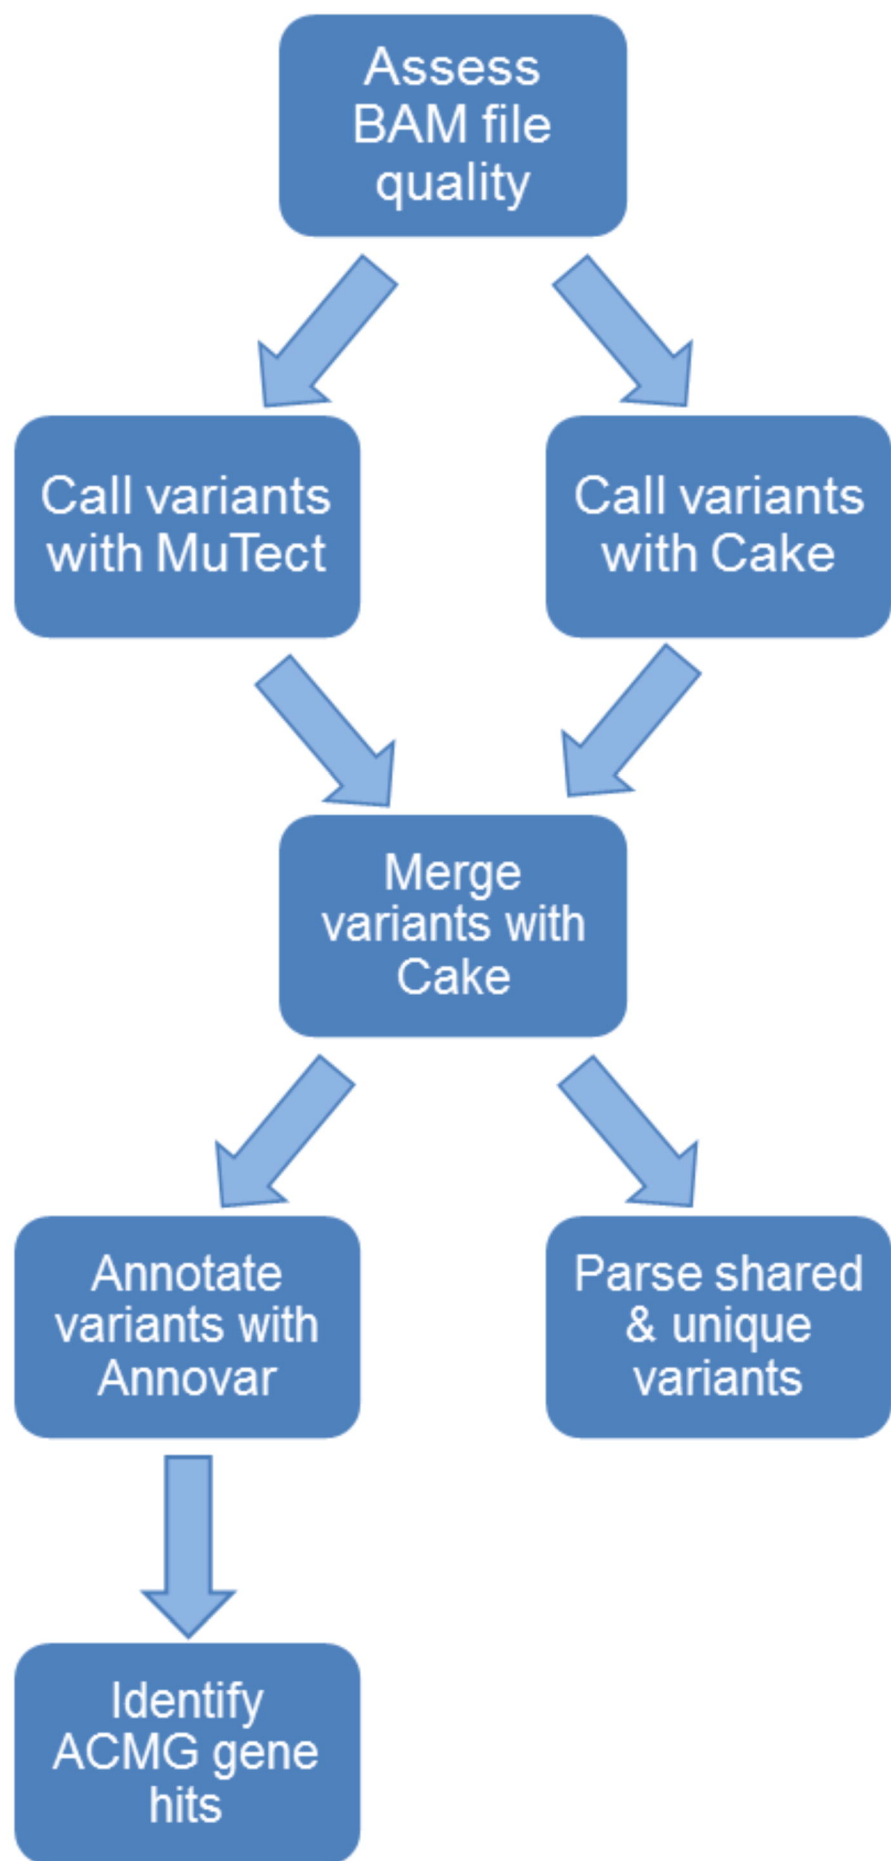

# 1. Input Data

GEO

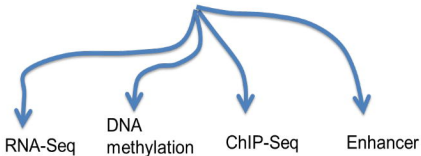

|             |        |       |           |           |
|-------------|--------|-------|-----------|-----------|
| Cell-Type A | Counts | Score | Peak Area | Peak Area |
| Cell-Type B | Counts | Score | Peak Area | Peak Area |
| Cell-Type C | Counts | Score | Peak Area | Peak Area |

# 2. Solve

$$Y = A X_1 + B X_2 + C X_3$$

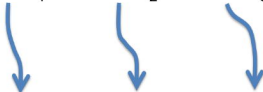

# 3. Model

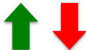

$$Y = A(\text{data}) + B(\text{data}) + C(\text{data})$$

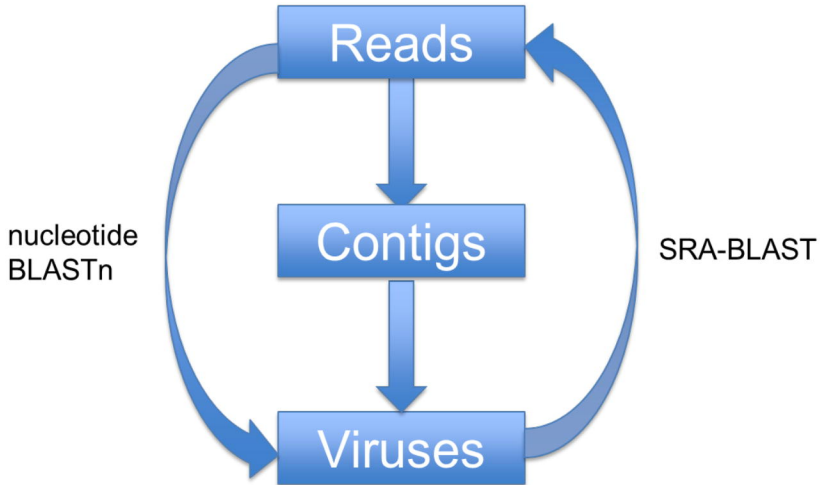

SRA toolkit  
(FASTQ)

bioRxiv preprint doi: <https://doi.org/10.1101/011111>; this version posted January 1, 2015. The copyright holder for this preprint (which was not certified by peer review) is the author/funder, who has granted bioRxiv a license to display the preprint in perpetuity. It is made available under aCC-BY-NC-ND 4.0 International license.

HISAT  
(Alignment)

Samtools  
(filtering, sorting,  
indexing)

Bambino  
(variant calling)

Tabulating  
counts for each  
variant type

Mapping  
locations to  
genes

Gene ontology  
analysis
